# Supplementary material
Source: HighWire-hosted journal article supplement (http://www.cfp.ca/highwire/filestream/32043/field_highwire_adjunct_files/0/354_Algorithm.pdf)
Supplement: 354_Algorithm.pdf [file 354_Algorithm.pdf]

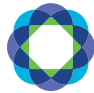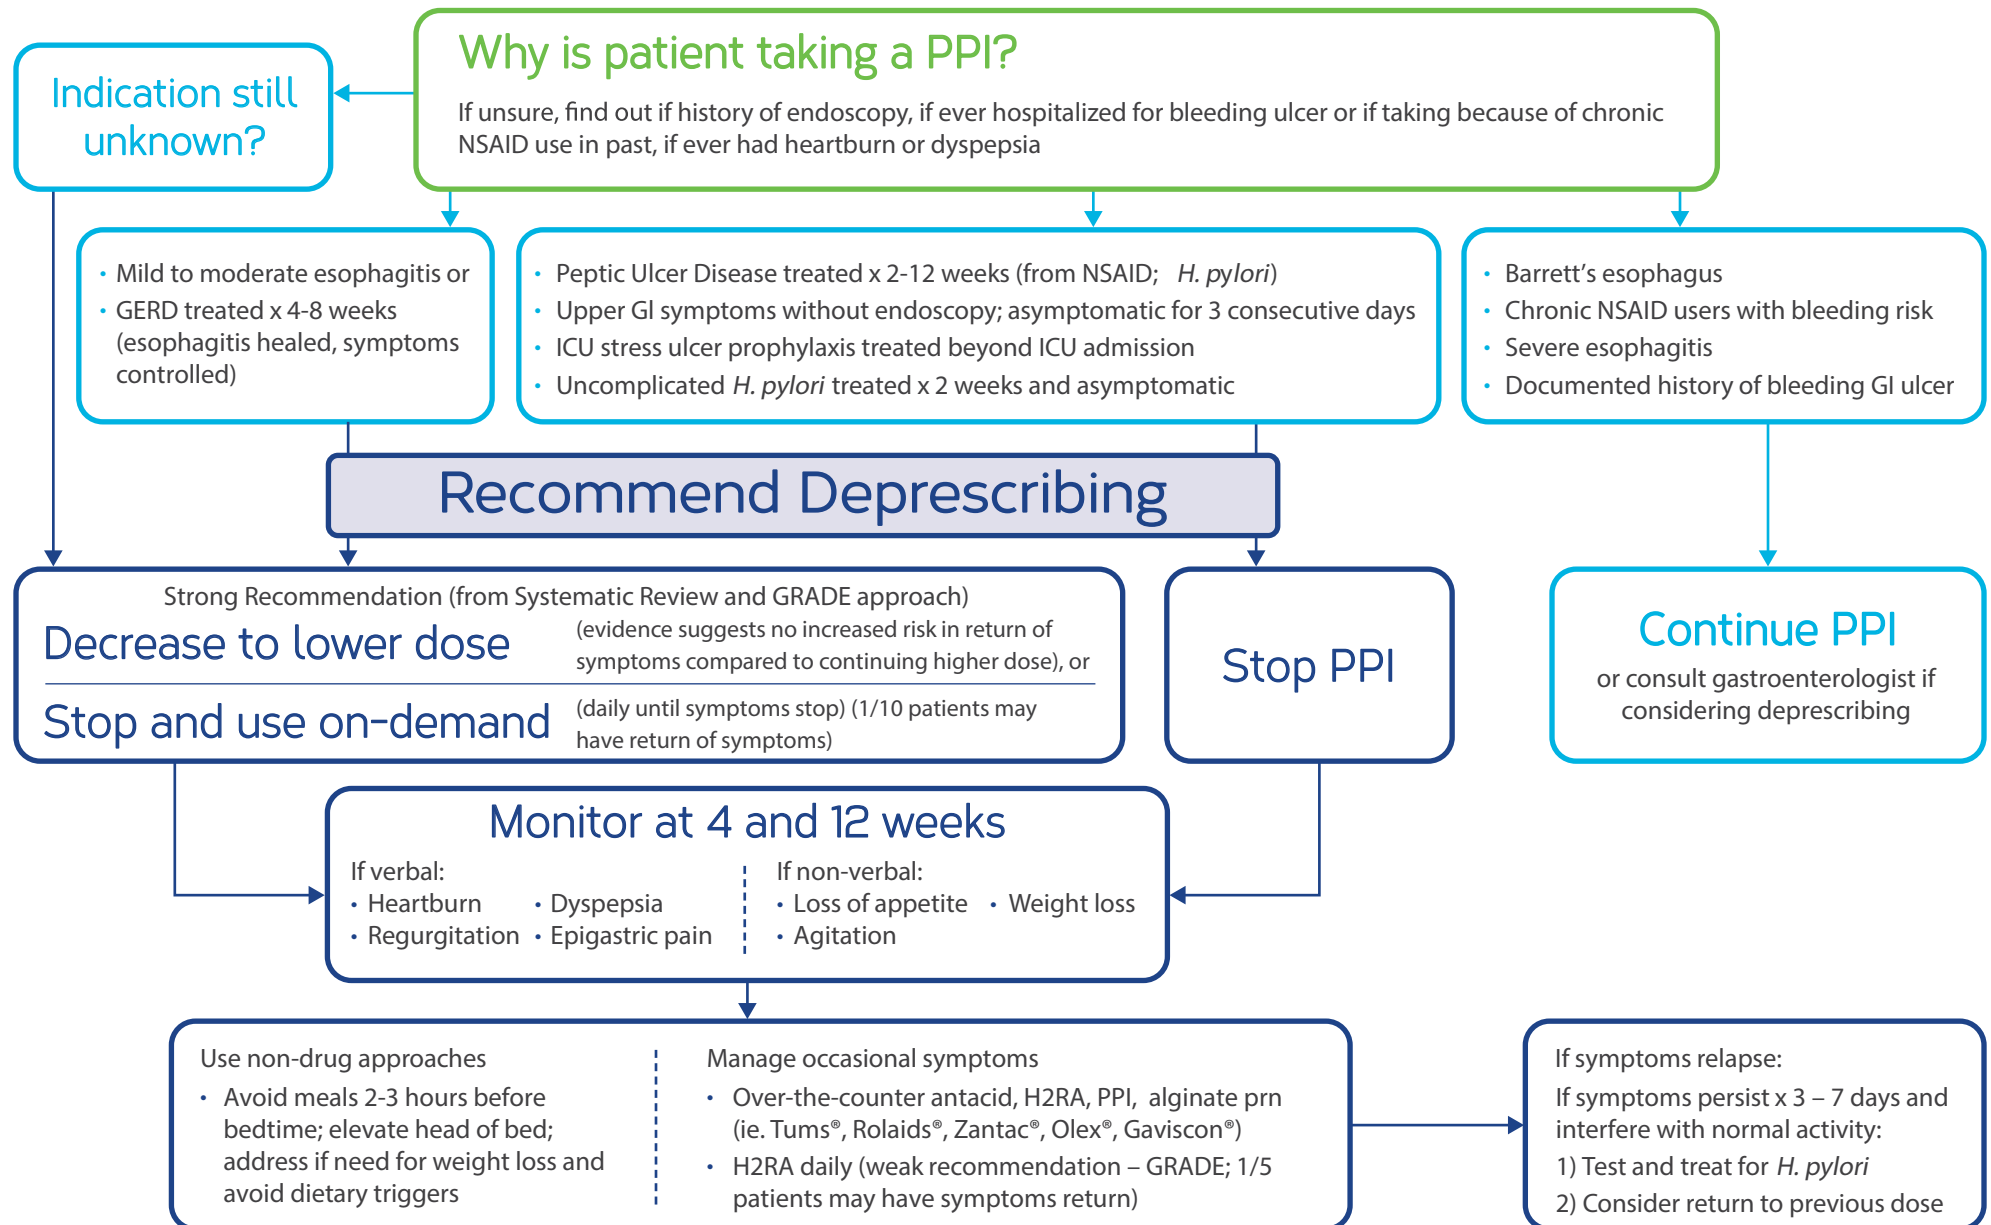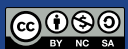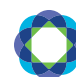

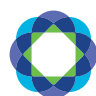

## PPI Availability

| PPI                                       | Standard dose (healing) (once daily)* | Low dose (maintenance) (once daily) |
|-------------------------------------------|---------------------------------------|-------------------------------------|
| Omeprazole (Losec®) - Capsule             | 20 mg <sup>+</sup>                    | 10 mg <sup>+</sup>                  |
| Esomeprazole (Nexium®) - Tablet           | 20 <sup>a</sup> or 40 <sup>b</sup> mg | 20 mg                               |
| Lansoprazole (Prevacid®) - Capsule        | 30 mg <sup>+</sup>                    | 15 mg <sup>+</sup>                  |
| Dexlansoprazole (Dexilant®) - Tablet      | 30 <sup>c</sup> or 60 <sup>d</sup> mg | 30 mg                               |
| Pantoprazole (Tecta®, Pantoloc®) - Tablet | 40 mg                                 | 20 mg                               |
| Rabeprazole (Pariet®) - Tablet            | 20 mg                                 | 10 mg                               |

## Legend

- a Non-erosive reflux disease
- b Reflux esophagitis
- c Symptomatic non-erosive gastroesophageal reflux disease
- d Healing of erosive esophagitis
- + Can be sprinkled on food

\* Standard dose PPI taken BID only indicated in treatment of peptic ulcer caused by *H. pylori*; PPI should generally be stopped once eradication therapy is complete unless risk factors warrant continuing PPI (see guideline for details)

## Key

GERD = gastroesophageal reflux disease

NSAID = nonsteroidal anti-inflammatory drugs

H2RA = H2 receptor antagonist

SR = systematic review

GRADE = Grading of Recommendations Assessment, Development and Evaluation

## Engaging patients and caregivers

Patients and/or caregivers may be more likely to engage if they understand the rationale for deprescribing (risks of continued PPI use; long-term therapy may not be necessary), and the deprescribing process

## PPI side effects

- When an ongoing indication is unclear, the risk of side effects may outweigh the chance of benefit
- PPIs are associated with higher risk of fractures, *C. difficile* infections and diarrhea, community-acquired pneumonia, vitamin B12 deficiency and hypomagnesemia
- Common side effects include headache, nausea, diarrhea and rash

## Tapering doses

- No evidence that one tapering approach is better than another
- Lowering the PPI dose (for example, from twice daily to once daily, or halving the dose, or taking every second day) OR stopping the PPI and using it on-demand are equally recommended strong options
- Choose what is most convenient and acceptable to the patient

## On-demand definition

Daily intake of a PPI for a period sufficient to achieve resolution of the individual's reflux-related symptoms; following symptom resolution, the medication is discontinued until the individual's symptoms recur, at which point, medication is again taken daily until the symptoms resolve

© Use freely, with credit to the authors. Not for commercial use. Do not modify or translate without permission.

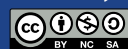

This work is licensed under a Creative Commons Attribution-NonCommercial ShareAlike 4.0 International License. Contact [deprescribing@bruyere.org](mailto:deprescribing@bruyere.org) or visit [deprescribing.org](http://deprescribing.org) for more information.

Farrell B, Pottie K, Thompson W, Boghossian T, Pizzola L, Rashid FJ, et al. Deprescribing proton pump inhibitors. Evidence-based clinical practice guideline. *Can Fam Physician* 2017;63:354-64 (Eng), e253-65 (Fr).

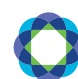

deprescribing.org

INSTITUT DE RECHERCHE

Bruyère  
RESEARCH INSTITUTE

open  
ONTARIO PHARMACY RESEARCH COLLABORATION
